# Supplementary material
Source: PubMed Central journal article supplement (PMC5479416)
Supplement: NIHMS860164-supplement-Supplemental_Tables.pdf [file NIHMS860164-supplement-Supplemental_Tables.pdf]

Supplemental Table 1. Prevalence of Life's Simple 7 factors by sex and Hispanic/Latino heritage in HCHS/SOL (Baseline 2008-2011).\*

|                          |              | Dominican       | Central American | Cuban           | Mexican         | Puerto Rican    | South American  | Total           |
|--------------------------|--------------|-----------------|------------------|-----------------|-----------------|-----------------|-----------------|-----------------|
|                          |              | %[95%CI]        | %[95%CI]         | %[95%CI]        | %[95%CI]        | %[95%CI]        | %[95%CI]        | %[95%CI]        |
| <b>Total</b>             |              |                 |                  |                 |                 |                 |                 |                 |
| <b>Diet</b>              |              |                 |                  |                 |                 |                 |                 |                 |
|                          | Ideal        | 1.2[0.8,1.9]    | 1.2[0.7,2.0]     | 0.9[0.6,1.3]    | 3[2.4,3.8]      | 0.6[0.2,1.3]    | 2.2[1.3,3.8]    | 1.7[1.4,2.0]    |
|                          | Intermediate | 36.2[33.6,38.9] | 32.8[30,35.8]    | 30.1[27.6,32.6] | 44.5[42.7,46.3] | 21.3[19.1,23.7] | 34.9[31.9,38]   | 35.1[33.9,36.3] |
|                          | Poor         | 62.6[59.9,65.2] | 66.0[63,68.8]    | 69.1[66.5,71.5] | 52.5[50.7,54.4] | 78.2[75.7,80.4] | 62.9[59.7,66]   | 63.3[61.9,64.6] |
| <b>Physical Activity</b> |              |                 |                  |                 |                 |                 |                 |                 |
|                          | Ideal        | 64.6[60.8,68.3] | 68.7[65.8,71.5]  | 55.7[53.0,58.3] | 67.9[66.1,69.7] | 68.1[65.4,70.7] | 68.5[65.2,71.7] | 65.2[64,66.4]   |
|                          | Intermediate | 16.1[13.7,18.8] | 13.8[11.6,16.4]  | 11.9[10.6,13.4] | 12.5[11.2,14]   | 13.1[11.2,15.3] | 12.3[10.2,14.9] | 12.9[12.1,13.7] |
|                          | Poor         | 19.3[16.9,21.9] | 17.5[15.5,19.6]  | 32.5[30,35.1]   | 19.6[17.9,21.4] | 18.8[16.9,20.8] | 19.1[16.5,22.1] | 21.9[20.8,23]   |
| <b>Smoking</b>           |              |                 |                  |                 |                 |                 |                 |                 |
|                          | Ideal        | 86.9[83.9,89.4] | 83.5[81.1,85.7]  | 70[67.2,72.7]   | 81.1[79.4,82.7] | 63.3[60.5,66.1] | 84.4[80.7,87.4] | 76.5[75.3,77.6] |
|                          | Intermediate | 1.8[1.3,2.5]    | 2.3[1.5,3.5]     | 2.8[2.1,3.6]    | 2.3[1.9,2.8]    | 3[2.2,4.1]      | 2.4[1.4,4.2]    | 2.5[2.2,2.8]    |
|                          | Poor         | 11.3[9.0,14.2]  | 14.2[12.2,16.6]  | 27.2[24.7,29.9] | 16.6[15.1,18.2] | 33.7[31.1,36.5] | 13.2[10.6,16.3] | 21.1[20,22.2]   |
| <b>Blood Pressure</b>    |              |                 |                  |                 |                 |                 |                 |                 |
|                          | Ideal        | 41.2[37.9,44.6] | 46.1[43.6,48.7]  | 40.3[38.2,42.4] | 52.5[50.4,54.6] | 42.4[39.7,45.1] | 53.9[50.4,57.4] | 46.5[45.3,47.7] |
|                          | Intermediate | 40.0[36.8,43.4] | 34.6[32.2,37.2]  | 41.3[39.0,43.5] | 35.7[33.8,37.6] | 40.8[38,43.6]   | 33.5[30.5,36.6] | 37.9[36.8,39.0] |
|                          | Poor         | 18.8[16.5,21.3] | 19.3[17.1,21.6]  | 18.5[16.8,20.2] | 11.8[10.5,13.3] | 16.8[15.1,18.7] | 12.6[10.4,15.1] | 15.7[14.9,16.5] |
| <b>Body Mass Index</b>   |              |                 |                  |                 |                 |                 |                 |                 |
|                          | Ideal        | 20.8[18.3,23.5] | 22.6[19.9,25.6]  | 25.8[23.6,28.2] | 20.8[19.3,22.4] | 20.4[18.1,23]   | 27.8[23.9,32]   | 22.3[21.4,23.3] |
|                          | Intermediate | 38.3[35.2,41.4] | 39.0[35.8,42.2]  | 37.1[34.7,39.5] | 40.3[38.1,42.5] | 32.8[30.0,35.6] | 41.9[38.0,46.0] | 37.8[36.7,39.0] |
|                          | Poor         | 41.0[37.6,44.5] | 38.4[35.6,41.3]  | 37.1[34.7,39.5] | 38.9[36.7,41.2] | 46.8[43.7,49.9] | 30.3[26.8,34.1] | 39.9[38.6,41.2] |
| <b>Cholesterol</b>       |              |                 |                  |                 |                 |                 |                 |                 |
|                          | Ideal        | 55.5[52.3,58.6] | 47.5[44.8,50.3]  | 47.6[45.6,49.7] | 50.1[48.4,51.9] | 54.4[51.7,57.2] | 47.1[43.2,51]   | 50.6[49.5,51.6] |
|                          | Intermediate | 32.6[29.8,35.6] | 34.5[31.7,37.3]  | 33.4[31.4,35.4] | 34.7[32.9,36.6] | 34.7[32.1,37.3] | 35.8[32.1,39.6] | 34.2[33.1,35.2] |

|                              |                 |                 |                 |                 |                 |                 |                 |
|------------------------------|-----------------|-----------------|-----------------|-----------------|-----------------|-----------------|-----------------|
| Poor                         | 11.9[10.1,14.1] | 18.0[15.7,20.6] | 19.1[17.3,21]   | 15.2[13.9,16.5] | 10.9[9.4,12.7]  | 17.2[14.9,19.7] | 15.3[14.5,16.1] |
| <b>Fasting Blood Glucose</b> |                 |                 |                 |                 |                 |                 |                 |
| Ideal                        | 67.3[64.3,70.1] | 65.1[62.2,67.9] | 66[63.7,68.2]   | 63.1[61.1,65.1] | 62.6[59.8,65.4] | 70.5[67,73.8]   | 64.4[63.2,65.6] |
| Intermediate                 | 26.9[24.2,29.7] | 27.4[24.8,30.2] | 29.4[27.4,31.6] | 29.3[27.4,31.3] | 29.9[27.3,32.6] | 25.8[22.6,29.3] | 29.1[28.1,30.2] |
| Poor                         | 5.9[4.6,7.5]    | 7.5[6.0,9.4]    | 4.5[3.7,5.6]    | 7.6[6.6,8.7]    | 7.5[6.5,8.7]    | 3.7[2.6,5.3]    | 6.4[6.0,7.0]    |

---

**Male**


---

**Diet**

|              |                 |                 |                 |                 |                 |                 |                 |
|--------------|-----------------|-----------------|-----------------|-----------------|-----------------|-----------------|-----------------|
| Ideal        | 0.8[0.3,2.0]    | 1.4[0.6,2.9]    | 0.7[0.3,1.4]    | 2.6[1.7,4.0]    | 0.2[0.1,0.5]    | 1.6[0.6,4.2]    | 1.3[1.0,1.8]    |
| Intermediate | 33.6[29.5,38]   | 27.4[23.4,31.8] | 31.2[27.7,34.9] | 44.7[41.9,47.6] | 19.3[16.3,22.8] | 32.0[27.0,37.5] | 33.8[32.0,35.6] |
| Poor         | 65.6[61.2,69.9] | 71.3[66.9,75.2] | 68.2[64.4,71.8] | 52.6[49.7,55.6] | 80.5[77.0,83.6] | 66.4[60.9,71.5] | 64.9[63.0,66.8] |

**Physical Activity**

|              |                 |                 |                 |                 |                 |                 |                 |
|--------------|-----------------|-----------------|-----------------|-----------------|-----------------|-----------------|-----------------|
| Ideal        | 74.1[69.6,78.2] | 75.2[70.2,79.7] | 65.4[61.5,69.1] | 76.1[73.5,78.5] | 76.4[73,79.5]   | 78.1[73.3,82.2] | 73.7[72.1,75.1] |
| Intermediate | 12.1[9.4,15.6]  | 11.0[7.8,15.4]  | 10.0[8.1,12.2]  | 9.4[7.8,11.4]   | 10.1[8.0,12.7]  | 11.0[8.0,15.0]  | 9.9[8.9,10.9]   |
| Poor         | 13.7[11.0,17.0] | 13.8[10.8,17.4] | 24.6[21.4,28.2] | 14.5[12.3,17.1] | 13.5[11.3,16.1] | 10.9[7.9,15]    | 16.5[15.2,17.9] |

**Smoking**

|              |                 |                 |                 |               |                 |                 |                 |
|--------------|-----------------|-----------------|-----------------|---------------|-----------------|-----------------|-----------------|
| Ideal        | 86.9[82.1,90.5] | 76.0[71.7,79.9] | 65.2[61.7,68.6] | 73.8[71,76.5] | 61.2[57.1,65.1] | 80.2[74.4,85.0] | 70.4[68.7,72.1] |
| Intermediate | 2.1[1.2,3.8]    | 2.9[1.6,5.2]    | 3.3[2.3,4.7]    | 2.7[2.0,3.5]  | 3.6[2.4,5.4]    | 4.5[2.6,7.6]    | 3.2[2.6,3.8]    |
| Poor         | 11[7.7,15.4]    | 21.1[17.5,25.1] | 31.5[28.3,35]   | 23.5[21,26.3] | 35.2[31.4,39.2] | 15.3[11.2,20.6] | 26.4[24.8,28.1] |

**Blood Pressure**

|              |                 |                 |                 |                 |                 |                 |                 |
|--------------|-----------------|-----------------|-----------------|-----------------|-----------------|-----------------|-----------------|
| Ideal        | 26.3[22,31.1]   | 40.3[35.9,44.9] | 32.9[29.8,36.2] | 41.5[38.6,44.4] | 37.7[33.6,42.1] | 47.0[41.4,52.7] | 37.6[36.0,39.2] |
| Intermediate | 50.6[45.3,55.8] | 38.5[34.1,43.0] | 48.0[44.7,51.3] | 45.2[42.2,48.2] | 45.8[41.8,49.9] | 37.5[32.5,42.7] | 45.6[43.9,47.3] |
| Poor         | 23.2[19.6,27.2] | 21.2[18.3,24.5] | 19[16.6,21.8]   | 13.3[11.2,15.8] | 16.4[13.9,19.4] | 15.5[12.0,19.8] | 16.8[15.6,18.2] |

**Body Mass Index**

|              |                 |                 |                 |                 |                 |                 |                 |
|--------------|-----------------|-----------------|-----------------|-----------------|-----------------|-----------------|-----------------|
| Ideal        | 18.8[15.3,22.9] | 24.7[20.3,29.8] | 26.5[23.2,30.1] | 18.2[16.2,20.4] | 24.0[20.7,27.6] | 23.1[18.8,28.2] | 22.1[20.7,23.6] |
| Intermediate | 43.5[38.3,49]   | 42.5[37.4,47.7] | 38.8[35.6,42.0] | 45.6[42.5,48.8] | 35.2[31.1,39.4] | 47.5[41.3,53.9] | 41.5[39.7,43.3] |

|                              |              |                 |                 |                 |                 |                 |                 |                 |
|------------------------------|--------------|-----------------|-----------------|-----------------|-----------------|-----------------|-----------------|-----------------|
| <b>Cholesterol</b>           | Poor         | 37.7[32.4,43.3] | 32.8[28.7,37.1] | 34.8[31.6,38.1] | 36.2[33.0,39.4] | 40.9[36.8,45.1] | 29.3[24.4,34.9] | 36.4[34.7,38.2] |
|                              | Ideal        | 53.5[48.4,58.5] | 47.7[42.8,52.6] | 48.1[44.7,51.5] | 48.4[45.8,51]   | 57.4[53.6,61.2] | 45.2[39.5,51]   | 50.2[48.7,51.8] |
|                              | Intermediate | 35.6[31.1,40.4] | 35.1[30.8,39.6] | 34.2[31.5,37.0] | 35.3[33.1,37.5] | 31.7[28.3,35.3] | 38.3[32.4,44.5] | 34.7[33.3,36.1] |
| <b>Fasting Blood Glucose</b> | Poor         | 10.9[7.9,14.9]  | 17.2[13.6,21.5] | 17.7[15.1,20.6] | 16.3[14.3,18.6] | 10.9[8.6,13.8]  | 16.5[12.8,21.0] | 15.1[14.0,16.3] |
|                              | Ideal        | 58.5[53.7,63.2] | 60.6[55.7,65.4] | 59.1[56.1,62.0] | 56.1[53.1,59.1] | 57.5[53.7,61.3] | 63.7[58.3,68.7] | 57.6[56.0,59.3] |
|                              | Intermediate | 35[30.3,40.1]   | 30.8[26.5,35.5] | 36.1[33.2,39.2] | 35.4[32.4,38.5] | 34.8[31.2,38.7] | 30.9[26.1,36.2] | 35.4[33.8,37.1] |
|                              | Poor         | 6.4[4.4,9.4]    | 8.6[6.3,11.5]   | 4.8[3.8,6.1]    | 8.5[7.0,10.3]   | 7.6[6.2,9.5]    | 5.4[3.4,8.5]    | 7.0[6.2,7.8]    |

---

**Female**

---

**Diet**

|              |                 |                 |                 |                 |                 |                 |                 |
|--------------|-----------------|-----------------|-----------------|-----------------|-----------------|-----------------|-----------------|
| Ideal        | 1.6[1.0,2.5]    | 1.0 [0.5,2.2]   | 1.1[0.6,1.9]    | 3.3[2.5,4.4]    | 0.9[0.3,2.1]    | 2.3[1.2,4.3]    | 2.0 [1.6,2.4]   |
| Intermediate | 37.9[34.5,41.4] | 36.8[33.3,40.4] | 28.6[25.8,31.6] | 44.2[41.9,46.5] | 22.9[20.1,26.1] | 37.7[33.4,42.2] | 36.1[34.7,37.5] |
| Poor         | 60.6[57.1,63.9] | 62.2[58.6,65.7] | 70.3[67.4,73.1] | 52.5[50.3,54.7] | 76.2[73.1,79.1] | 60[55.6,64.2]   | 61.9[60.5,63.3] |

**Physical Activity**

|              |                 |                 |                 |                 |                 |                 |                 |
|--------------|-----------------|-----------------|-----------------|-----------------|-----------------|-----------------|-----------------|
| Ideal        | 58.6[53.5,63.4] | 62.5[58.8,66.0] | 44.8[41.5,48.1] | 60.9[58.5,63.2] | 59.7[55.8,63.4] | 60.4[55.4,65.2] | 57.6[56.1,59.1] |
| Intermediate | 18.6[15.5,22.3] | 16.7[13.8,20.0] | 14.0[12.0,16.3] | 15.3[13.5,17.2] | 16.4[13.4,19.8] | 14.2[11.2,17.8] | 15.7[14.6,16.9] |
| Poor         | 22.8[19.7,26.3] | 20.8[18.2,23.8] | 41.3[37.8,44.8] | 23.8[21.7,26.2] | 24.0[21.0,27.2] | 25.4[21.5,29.8] | 26.7[25.4,28.1] |

**Smoking**

|              |                 |               |                 |                 |                 |                 |                 |
|--------------|-----------------|---------------|-----------------|-----------------|-----------------|-----------------|-----------------|
| Ideal        | 86.9[82.7,90.2] | 90.1[87.7,92] | 75.3[72.3,78.1] | 87.7[85.5,89.5] | 65.3[61.6,68.7] | 87.5[83.6,90.6] | 82[80.7,83.2]   |
| Intermediate | 1.6[1.0,2.5]    | 1.6[0.9,2.8]  | 2.2[1.5,3.3]    | 1.9[1.4,2.6]    | 2.2[1.5,3.4]    | 0.6[0.2,2.2]    | 1.9[1.6,2.2]    |
| Poor         | 11.5[8.3,15.7]  | 8.3[6.5,10.6] | 22.4[19.7,25.4] | 10.4[8.7,12.5]  | 32.5[29.2,36.0] | 12.0[9.1,15.5]  | 16.1[15.0,17.4] |

**Blood Pressure**

|              |                 |                 |                 |                 |                 |                 |                 |
|--------------|-----------------|-----------------|-----------------|-----------------|-----------------|-----------------|-----------------|
| Ideal        | 50.9[47.2,54.6] | 53.1[50.5,55.8] | 48.8[46.3,51.3] | 62.4[59.4,65.3] | 48.3[45.2,51.4] | 60.8[56.6,64.9] | 55.1[53.6,56.6] |
| Intermediate | 33.2[29.2,37.5] | 29.5[26.7,32.4] | 33.7[31.1,36.4] | 27.1[24.7,29.7] | 34.7[31.3,38.2] | 28.7[25.0,32.7] | 30.4[29.1,31.8] |

|                              |              |                 |                 |                 |                 |                 |                 |                 |
|------------------------------|--------------|-----------------|-----------------|-----------------|-----------------|-----------------|-----------------|-----------------|
|                              | Poor         | 15.9[13.4,18.7] | 17.4[14.8,20.4] | 17.5[15.7,19.4] | 10.5[9.1,12.1]  | 17.1[14.7,19.7] | 10.5[8.2,13.3]  | 14.5[13.6,15.4] |
| <b>Body Mass Index</b>       |              |                 |                 |                 |                 |                 |                 |                 |
|                              | Ideal        | 22.1[18.6,26.0] | 21.4[18.2,25.0] | 25.3[22.3,28.6] | 23.1[20.8,25.7] | 16.8[14.1,19.8] | 32.5[27.0,38.6] | 22.7[21.3,24.1] |
|                              | Intermediate | 34.7[30.4,39.3] | 35.7[32.4,39.2] | 35.1[31.9,38.5] | 35.8[33.2,38.5] | 31[27.5,34.7]   | 36.6[31.8,41.7] | 34.5[33.2,35.9] |
|                              | Poor         | 43.2[38.4,48.1] | 42.9[39.0,46.9] | 39.6[36.1,43.1] | 41.1[38.2,44.0] | 52.2[48.0,56.5] | 30.9[26.5,35.6] | 42.8[41.1,44.4] |
| <b>Cholesterol</b>           |              |                 |                 |                 |                 |                 |                 |                 |
|                              | Ideal        | 56.6[52.9,60.3] | 48.7[45.1,52.4] | 47.3[44.6,50.1] | 52.1[49.8,54.3] | 52.5[48.9,55.9] | 49.9[44.7,55.1] | 51.3[50.0,52.6] |
|                              | Intermediate | 30.7[27.2,34.5] | 33.1[29.6,36.8] | 32.5[29.9,35.1] | 34.0[31.6,36.6] | 37.0[33.4,40.7] | 33.5[29,38.3]   | 33.6[32.2,35.0] |
|                              | Poor         | 12.7[10.4,15.3] | 18.2[15,21.9]   | 20.2[18.2,22.4] | 13.9[12.3,15.7] | 10.6[8.7,12.8]  | 16.6[13.8,19.7] | 15.1[14.2,16.1] |
| <b>Fasting Blood Glucose</b> |              |                 |                 |                 |                 |                 |                 |                 |
|                              | Ideal        | 73.0[69.5,76.3] | 69.1[66.1,72]   | 73.9[71.3,76.4] | 69.3[66.6,71.8] | 67.8[64.3,71.0] | 77.0[72.8,80.7] | 70.6[69.2,72.1] |
|                              | Intermediate | 21.5[18.8,24.4] | 24.0[21.1,27.2] | 21.8[19.7,24.1] | 24.0[21.7,26.3] | 24.7[21.9,27.7] | 20.0[16.4,24.3] | 23.4[22.1,24.7] |
|                              | Poor         | 5.5[3.9,7.8]    | 6.9[5.1,9.1]    | 4.3[3.2,5.6]    | 6.8[5.7,8.0]    | 7.6[6.1,9.4]    | 3.0[2.0,4.6]    | 6.0[5.4,6.7]    |

With the exception of fasting blood glucose prevalence estimates for males ( $p=0.0037$ ) differences in estimated prevalences were significant at  $p<0.001$  based on a global Rao-Scott survey adjusted  $\chi^2$  test that the estimated prevalences from a two-way ( $6 \times 3$ ) table are independent. CI indicates confidence interval.

Detailed descriptions of how criteria for Ideal, Intermediate, and Poor Life's Simple 7 of cardiovascular health are provided in Table 1.

\*Age standardization is performed by applying weights based on a standard national census age distribution to the estimated prevalence in the HCHS/SOL data. By doing so we reduce the confounding effects of age when comparing prevalence across data sets with different age

Supplemental Table 2. HCHS/SOL (Baseline 2008-2011) overall and sex specific association of American Heart Association Life's Simple 7 (LS7) score with prevalent cardiovascular disease: Coronary Heart Disease, and Stroke/TIA.

|                           | Coronary Heart Disease |                    |                     |                    |                    |                    |
|---------------------------|------------------------|--------------------|---------------------|--------------------|--------------------|--------------------|
|                           | Overall                |                    | Males               |                    | Females            |                    |
|                           | Model1                 | Model2             | Model1              | Model2             | Model1             | Model2             |
|                           | OR[95%CI]              | OR[95%CI]          | OR[95%CI]           | OR[95%CI]          | OR[95%CI]          | OR[95%CI]          |
| <b>AHA LS7 (0-14)†</b>    | 0.86***[0.82,0.90]     | 0.87***[0.83,0.92] | 0.87***[0.82,0.93]  | 0.88***[0.82,0.94] | 0.83***[0.78,0.88] | 0.87***[0.82,0.93] |
| <b>Sex</b>                |                        |                    |                     |                    |                    |                    |
| Female                    | 0.71**[0.58,0.88]      | 0.63***[0.51,0.78] |                     |                    |                    |                    |
| <b>Age</b>                |                        |                    |                     |                    |                    |                    |
| 18-44                     | 1.00[1.00,1.00]        | 1.00[1.00,1.00]    | 1.00[1.00,1.00]     | 1.00[1.00,1.00]    | 1.00[1.00,1.00]    | 1.00[1.00,1.00]    |
| 45-54                     | 1.79***[1.36,2.37]     | 1.48* [1.09,2.00]  | 1.99***[1.29,3.05]  | 1.69*[1.03,2.77]   | 1.53*[1.06,2.22]   | 1.31[0.90,1.91]    |
| 55-64                     | 3.76***[2.87,4.93]     | 2.76***[1.98,3.84] | 4.58***[3.03,6.92]  | 3.24***[1.85,5.70] | 2.87***[1.92,4.30] | 2.40***[1.59,3.61] |
| 65+                       | 5.42***[3.89,7.57]     | 3.02***[2.02,4.51] | 6.93***[4.26,11.29] | 3.76***[1.86,7.59] | 3.97***[2.58,6.12] | 2.51***[1.61,3.92] |
| <b>Latino heritage</b>    |                        |                    |                     |                    |                    |                    |
| Dominican                 |                        | 1.17[0.81,1.70]    |                     | 0.88[0.51,1.52]    |                    | 1.51[0.97,2.36]    |
| Central American          |                        | 0.93[0.67,1.31]    |                     | 0.85[0.50,1.42]    |                    | 1.03[0.65,1.64]    |
| Cuban                     |                        | 1.19[0.87,1.64]    |                     | 1.09[0.70,1.69]    |                    | 1.3[0.83,2.04]     |
| Mexican                   |                        | 1.00[1.00,1.00]    |                     | 1.00[1.00,1.00]    |                    | 1.00[1.00,1.00]    |
| Puerto Rican              |                        | 1.52* [1.10,2.10]  |                     | 1.24[0.82,1.89]    |                    | 1.90** [1.18,3.06] |
| South American            |                        | 1.02[0.67,1.53]    |                     | 0.67[0.34,1.31]    |                    | 1.44[0.86,2.41]    |
| <b>Education</b>          |                        |                    |                     |                    |                    |                    |
| Less than high school     |                        | 1.00[1.00,1.00]    |                     | 1.00[1.00,1.00]    |                    | 1.00[1.00,1.00]    |
| High school or equivalent |                        | 0.75* [0.58,0.97]  |                     | 0.68*[0.47,0.99]   |                    | 0.84[0.61,1.16]    |
| Some college              |                        | 0.91[0.71,1.15]    |                     | 0.89[0.63,1.26]    |                    | 0.94[0.65,1.38]    |
| College or more           |                        | 0.94[0.69,1.27]    |                     | 0.92[0.61,1.37]    |                    | 0.94[0.61,1.44]    |
| <b>Income</b>             |                        |                    |                     |                    |                    |                    |

|                                       |                    |                    |                    |
|---------------------------------------|--------------------|--------------------|--------------------|
| <=\$20,000                            | 1.00[1.00,1.00]    | 1.00[1.00,1.00]    | 1.00[1.00,1.00]    |
| \$20,001-\$50,000                     | 0.61***[0.49,0.76] | 0.78[0.55,1.11]    | 0.45***[0.32,0.64] |
| >=\$50,001                            | 0.58* [0.38,0.89]  | 0.66[0.37,1.19]    | 0.54[0.24,1.22]    |
| Not Reported                          | 0.77[0.56,1.04]    | 0.95[0.54,1.67]    | 0.66* [0.45,0.96]  |
| <b>Marital Status</b>                 |                    |                    |                    |
| Single                                | 1.00[1.00,1.00]    | 1.00[1.00,1.00]    | 1.00[1.00,1.00]    |
| Married/Partner                       | 1.22[0.92,1.61]    | 1.11[0.74,1.64]    | 1.3[0.86,1.98]     |
| Separated/Divorced/Widowed            | 1.42* [1.08,1.86]  | 1.29[0.87,1.91]    | 1.55* [1.07,2.26]  |
| <b>Nativity/Years of US Residence</b> |                    |                    |                    |
| US born                               | 1.00[1.00,1.00]    | 1.00[1.00,1.00]    | 1.00[1.00,1.00]    |
| <5 Years                              | 0.83[0.51,1.35]    | 1.23[0.63,2.40]    | 0.55[0.29,1.06]    |
| 5-15 Years                            | 1.15[0.73,1.82]    | 1.65[0.78,3.48]    | 0.8[0.48,1.32]     |
| 15+ Years                             | 1.4[0.97,2.00]     | 1.80*[1.05,3.10]   | 1.04[0.67,1.63]    |
| <b>Language preference</b>            |                    |                    |                    |
| Spanish                               | 1.00[1.00,1.00]    | 1.00[1.00,1.00]    | 1.00[1.00,1.00]    |
| English                               | 1.15[0.84,1.59]    | 1.4[0.84,2.35]     | 0.93[0.64,1.37]    |
| <b>Insurance Status</b>               |                    |                    |                    |
| Not Insured                           | 1.00[1.00,1.00]    | 1.00[1.00,1.00]    | 1.00[1.00,1.00]    |
| Insured                               | 2.02***[1.60,2.54] | 2.07***[1.43,2.99] | 1.88***[1.41,2.51] |

|                | Stroke TIA         |                    |                  |                  |                    |                    |
|----------------|--------------------|--------------------|------------------|------------------|--------------------|--------------------|
|                | Overall            |                    | Males            |                  | Females            |                    |
|                | Model1             | Model2             | Model1           | Model2           | Model1             | Model2             |
|                | OR[95%CI]          | OR[95%CI]          | OR[95%CI]        | OR[95%CI]        | OR[95%CI]          | OR[95%CI]          |
| AHA LS7 (0-14) | 0.85***[0.79,0.92] | 0.88** [0.81,0.95] | 0.86*[0.76,0.97] | 0.87*[0.77,0.97] | 0.84***[0.78,0.90] | 0.90** [0.83,0.97] |
| Sex            |                    |                    |                  |                  |                    |                    |

|                            |                     |                    |                     |                     |                     |                     |
|----------------------------|---------------------|--------------------|---------------------|---------------------|---------------------|---------------------|
| Female                     | 0.79[0.59,1.06]     | 0.71* [0.52,0.98]  |                     |                     |                     |                     |
| <b>Age</b>                 |                     |                    |                     |                     |                     |                     |
| 18-44                      | 1.00[1.00,1.00]     | 1.00[1.00,1.00]    | 1.00[1.00,1.00]     | 1.00[1.00,1.00]     | 1.00[1.00,1.00]     | 1.00[1.00,1.00]     |
| 45-54                      | 2.42***[1.52,3.85]  | 2.51***[1.55,4.05] | 2.44**[1.25,4.75]   | 2.92**[1.45,5.90]   | 2.35**[1.28,4.33]   | 2.31** [1.25,4.25]  |
| 55-64                      | 3.28***[2.07,5.19]  | 3.32***[2.02,5.46] | 3.39***[1.81,6.38]  | 3.53***[1.72,7.24]  | 3.08***[1.67,5.69]  | 3.16***[1.73,5.80]  |
| 65+                        | 7.03***[4.29,11.51] | 5.73***[3.33,9.86] | 8.10***[4.06,16.17] | 6.68***[2.78,16.04] | 5.96***[2.93,12.12] | 5.09***[2.52,10.27] |
| <b>Latino heritage</b>     |                     |                    |                     |                     |                     |                     |
| Dominican                  |                     | 2.07* [1.19,3.60]  |                     | 1.91[0.93,3.94]     |                     | 2.60* [1.21,5.59]   |
| Central American           |                     | 2.15** [1.21,3.81] |                     | 1.3[0.53,3.18]      |                     | 4.19***[2.20,7.97]  |
| Cuban                      |                     | 1.79* [1.06,3.02]  |                     | 1.04[0.47,2.29]     |                     | 3.82***[2.06,7.08]  |
| Mexican                    |                     | 1.00[1.00,1.00]    |                     | 1.00[1.00,1.00]     |                     | 1.00[1.00,1.00]     |
| Puerto Rican               |                     | 2.08** [1.23,3.52] |                     | 1.13[0.54,2.35]     |                     | 4.53***[2.47,8.31]  |
| South American             |                     | 1.2[0.52,2.77]     |                     | 0.22*[0.05,0.99]    |                     | 3.11* [1.22,7.92]   |
| <b>Education</b>           |                     |                    |                     |                     |                     |                     |
| Less than high school      |                     | 1.00[1.00,1.00]    |                     | 1.00[1.00,1.00]     |                     | 1.00[1.00,1.00]     |
| High school or equivalent  |                     | 0.77[0.51,1.17]    |                     | 0.91[0.51,1.60]     |                     | 0.59* [0.35,0.98]   |
| Some college               |                     | 0.93[0.57,1.50]    |                     | 0.7[0.31,1.59]      |                     | 1.08[0.58,2.01]     |
| College or more            |                     | 0.82[0.47,1.43]    |                     | 0.84[0.36,1.94]     |                     | 0.78[0.39,1.57]     |
| <b>Income</b>              |                     |                    |                     |                     |                     |                     |
| <=\$20,000                 |                     | 1.00[1.00,1.00]    |                     | 1.00[1.00,1.00]     |                     | 1.00[1.00,1.00]     |
| \$20,001-\$50,000          |                     | 0.7[0.44,1.10]     |                     | 0.77[0.44,1.37]     |                     | 0.6[0.32,1.14]      |
| >=\$50,001                 |                     | 0.24***[0.11,0.55] |                     | 0.21*[0.06,0.73]    |                     | 0.31* [0.11,0.84]   |
| Not Reported               |                     | 0.55* [0.34,0.90]  |                     | 0.53[0.23,1.24]     |                     | 0.59[0.33,1.07]     |
| <b>Marital Status</b>      |                     |                    |                     |                     |                     |                     |
| Single                     |                     | 1.00[1.00,1.00]    |                     | 1.00[1.00,1.00]     |                     | 1.00[1.00,1.00]     |
| Married/Partner            |                     | 0.86[0.52,1.42]    |                     | 0.6[0.32,1.10]      |                     | 1.24[0.61,2.50]     |
| Separated/Divorced/Widowed |                     | 1.15[0.74,1.78]    |                     | 0.9[0.44,1.83]      |                     | 1.49[0.86,2.58]     |

**Nativity/Years of US Residence**

|            |                 |                  |                   |
|------------|-----------------|------------------|-------------------|
| US born    | 1.00[1.00,1.00] | 1.00[1.00,1.00]  | 1.00[1.00,1.00]   |
| <5 Years   | 0.45[0.17,1.15] | 0.53[0.13,2.08]  | 0.25* [0.08,0.79] |
| 5-15 Years | 0.51[0.26,1.01] | 0.25*[0.08,0.83] | 0.91[0.40,2.06]   |
| 15+ Years  | 0.56[0.29,1.09] | 0.4[0.13,1.21]   | 0.76[0.37,1.55]   |

**Language preference**

|         |                 |                 |                 |
|---------|-----------------|-----------------|-----------------|
| Spanish | 1.00[1.00,1.00] | 1.00[1.00,1.00] | 1.00[1.00,1.00] |
| English | 1.08[0.55,2.13] | 0.66[0.21,2.12] | 1.63[0.91,2.90] |

**Insurance Status**

|             |                    |                   |                 |
|-------------|--------------------|-------------------|-----------------|
| Not Insured | 1.00[1.00,1.00]    | 1.00[1.00,1.00]   | 1.00[1.00,1.00] |
| Insured     | 1.91***[1.37,2.67] | 2.41**[1.42,4.10] | 1.38[0.86,2.24] |

OR indicates odds ratio. CI indicates confidence interval.

\*\*\*P<0.01, \*\*P<0.01, \*P<0.05 from survey data logistic regression models

†AHA LS7 (0-14) generated by summing across respondent indexed values on the individual trichotomous (i.e. 0=Poor, 1=Intermediate, and 2=Ideal). Higher LS7 scores indicate better cardiovascular health.





Supplemental Figure 1. HCHS/SOL (Baseline 2008-2011) predicted probabilities of cardiovascular outcomes (Coronary Heart Disease and Stroke/TIA) by American Heart Association Life's Simple 7 (LS7s) scores by sex.

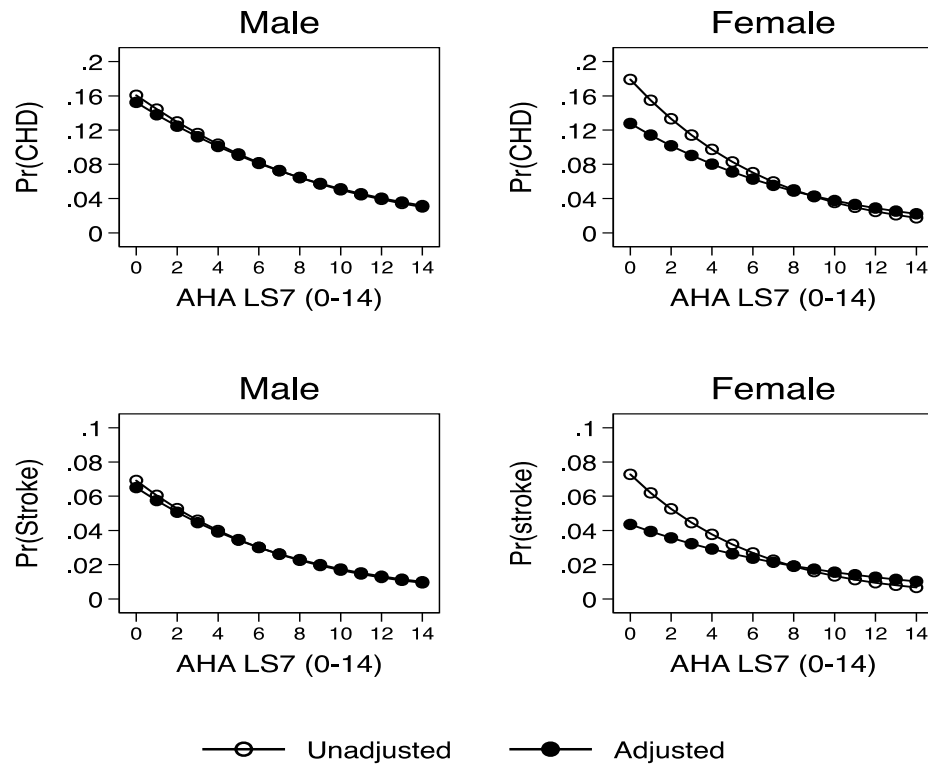

Adjusted models include age, education, Latino heritage, income, marital status, nativity/years of US residence, language preference, and insurance.

AHA LS7 (0-14) generated by summing across respondent indexed values on the individual trichotomous (i.e. 0=Poor, 1=Intermediate, and 2=Ideal) higher LS7 scores indicate better cardiovascular health.
